# Supplementary material for: Micromixer driven by bubble-induced acoustic microstreaming for multi-ink 3D bioprinting
Source: Royal Society of Chemistry journal article supplement (doi:10.1039/d4lc00552j), 2024-01-01
Supplement: d4lc00552j1.pdf [file d4lc00552j1.pdf]

## Micromixer driven by bubble-induced acoustic microstreaming for multi-ink 3D bioprinting

Mitsuyuki HIDAHA<sup>a</sup>, Masaru KOJIMA<sup>a</sup>, and Shinji SAKAI<sup>a\*</sup>

a. Division of Chemical Engineering, Department of Materials Engineering Science, Graduate School of Engineering Science, Osaka University, 1-3 Machikaneyama-cho, Toyonaka, Osaka, Email: sakai@cheng.es.osaka-u.ac.jp

\* Corresponding author: Professor Shinji Sakai, Email: sakai@cheng.es.osaka-u.ac.jp

### Supporting information

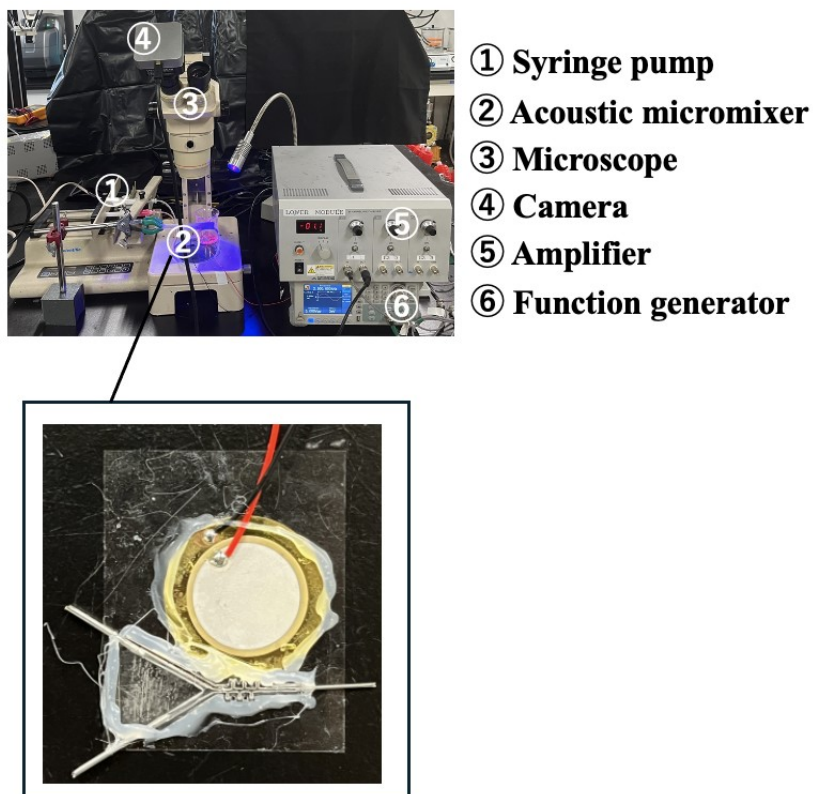

Figure S1: Overall view of experimental setup

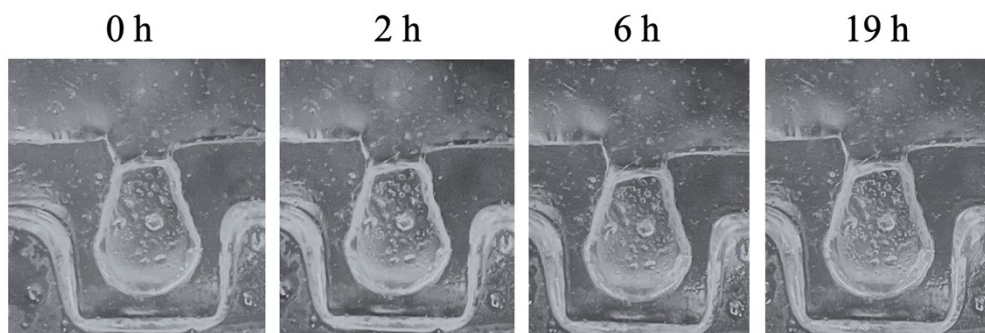

Figure S2: Bubble stability test. The channel of the nozzle was filled with 0.5 wt% SA solution for 19 h.

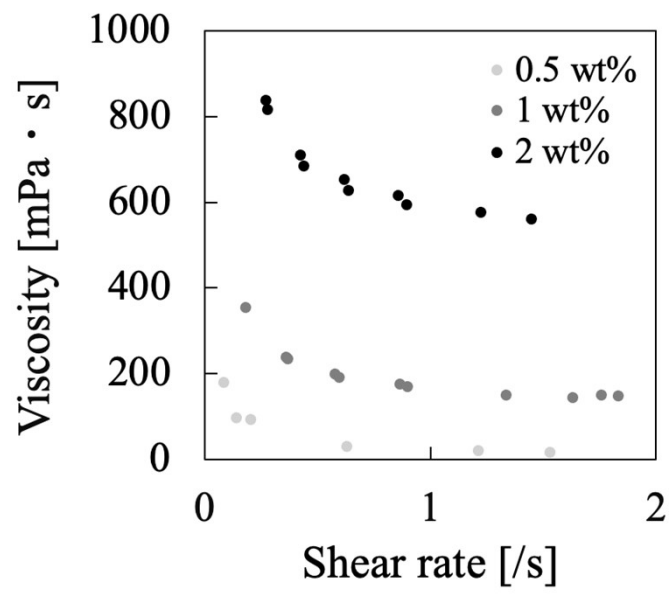

Figure S3: Viscosity of 0.5, 1 and 2 wt% of sodium alginate aqueous solutions

Table S1: Surface tension and density of 0.5,1.0 and 2.0 wt% SA solutions

| SA conc.<br>[wt%] | Surface tension<br>[mN/m] | Density<br>[g/cm <sup>3</sup> ] |
|-------------------|---------------------------|---------------------------------|
| 0.5               | 15.2 ± 0.4                | 1.001                           |
| 1.0               | 15.7 ± 0.4                | 1.006                           |
| 2.0               | 21.2 ± 0.5                | 1.016                           |
